# Supplementary material
Source: Elsevier journal article supplement (https://www.sciencedirect.com/science/article/pii/S0121812321001419)
Supplement: mmc1 [file S0121812321001419:mmc1.doc]

Table S1. Study demographics and outcomes

| **Author** | **Country** | **Study type** | **Total patient** | **Age (years)** | **Sex** | **Ethincity** | **BMI (kg/m2)** | **Comorbidity** |
| --- | --- | --- | --- | --- | --- | --- | --- | --- |
| Ahsan T6 | Pakistan | Case report | 1 | 28 | M | Pakistan | 28,48 | Thalassemia Minor |
| Kofman AD13 | US | Case report | 1 | 25 | F | NA | NA | None |
| Malangu B14 | US | Case report | 1 | 46 | M | Latin | NA | None |
| Boudhabhay I15 | France | Case report | 1 | 46 | M | African | 36 | Arterial Hypertension And Obesity |
| Jones I16 | UK | Case report | 1 | 21 | M | Somali | NA | NA |
| Lidder AK17 | US | Case report | 1 | 45 | M | NA | NA | NA |
| Shaigany S18 | US | Case report | 1 | 45 | M | Hispanic | 26,6 | None |
| Fox S19 | US | Case report | 1 | 31 | F | African-american | 31 | Hypertension & Diabetes |
| Morris SB4 | US & UK | Case series | 9 | 27 | F | African-american | NA | None |
| 50 | M | American | NA | None |
| 46 | M | African-american | NA NA | Obesity, Chronic Right Lower Extremity Pain |
| 21 | M | African-american | NA NA | Obesity |
| 33 | M | African-american | NA NA | Obesity, Hypertention, Depression |
| 22 | F | African-american | NA NA | None |
| 21 | F | African-american | NA NA | Obesity |
| 47 | F | African-american | NA NA | None |
| 42 | M | Asian | NA NA | Obesity |
| Hekimian G20 | France | case series | 11 | 40 | M | NA | 26 | Diabetes |
|  | 22 | M | NA | 38 | Diabetes, Asthma |
|  | 25 | F | NA | 23 | None |
|  | 37 | M | NA | 35 | Hypertension |
|  | 29 | F | NA | 22 | None |
| Chérif MY7 | Belgium | Case report | 1 | 35 | F | NA | NA | NA |
| Sokolovsky S21 | USA | Case report | 1 | 36 | F | Hispanic | NA | NA |
| Cogan E9 | Belgium | case report | 1 | 20 | F | Caucasian | 24,7 | NA |
| Flower L10 | UK | case report | 1 | 22 | F | Nigerian | NA | Sickle Cell |
| Christopher Newton-Cheh11 | US | case report | 1 | 44 | F | Hispanic | 23,7 | GERD, Mild Obstructive Sleep Apnea, Depression |
| Meredith J Ventura12 | US | case report | 1 | 38 | F | Hispanic | NA | NA |

Table S2. Signs and Symptoms and Laboratory Results

| Author | **SARS-CoV-2 Test** | | **Interval from last infection (days)** | **Delay from onset admission (days)** | **Sign and Symptoms** | **Findings of rheumatologic interest** | **Inflammatory Markers** | | | | | | | | **Outcomes** | |
| --- | --- | --- | --- | --- | --- | --- | --- | --- | --- | --- | --- | --- | --- | --- | --- | --- |
| **PCR** | **Antibody serology** | **ESR (mmHg)** | **Ferritin (ng/mL)** | **CRP (mg/dL)** | **D-dimer (ng/mL)** | **Procalcitonin (mg/L)** | **Fibrinogen (ng/dL)** | **LDH (u/L)** | **IL-6 (pg/mL)** | **ICU Admission** | **Mortality** |
| Ahsan T6 | (-) | (+) | 14 | 5 | fever nausea and vomiting, aching in legs and body generalized weakness,  swelling of feet,  constipation and some difficulty in voiding urine blurring of vision and intermittent diplopia on lateral gaze BP 130/70 mmHg, RR 22 breaths/min and HR 110 beats/min. | - rash (generalized morbiliform) - eyes: red without exudation - ache: body esp legs - low grade fever - generalized weakness | 58 | 613.9 | 13.19 | NA | NA | NA | NA | NA | No | No |
| Kofman AD 12 | (+) | (+) | NA | 7 | fatigue.  weakness,  dyspnea,  low-grade fevers,  mild cough, sore throat, vomiting, diarrhea, and lymph node swelling (BP 98/56 mmHg) normal oxygen saturation on room air.  tender cervical lymphadenopathy; tenderness to palpation in the left lower abdominal quadrant. | - conjunctival injection without perilimbal sparing;  - cracked & erythematous lips - generalized weakness - cervical lymphadenopathy | 92 | 798 | 90 | 960 | NA | NA | NA | NA | Yes | No |
| Malangu B 14 | (-) | (+) | 30 | 30 | - 2 months of persistent shortness of breath - febrile of 39.1°C.sore throat, dry cough,  - general malaise, and recent onset pleuritic chest pain. - HR 130 and 180 bpm  -mild hypoxia with pulse oximetry of 91% while on room air; .  - irregularly irregular rhythm without significant murmur or peripheral edema. | - diffuse nonpruritic skin rash (back, abdomen, pelvis, and bilateral upper extremities) - bilateral conjunctival injection without exudates and mild oral mucositis.  - bilateral cervical lymphadenopathy - coalescing erythematous macular rash (upper extremities, abdomen, back, and groin) - A rash with perioral distribution on the face | NA | 827 | 74 | 4400 | NA | NA | 253 | NA | No | No |
| Boudhabhay I 15 | (-) | (+) | NA | NA | 189/123 mmHg and fever -On day 4: evanescent facial erythema, developed acute myocardial dysfunction | NA | NA | 3206 | 312 | NA | NA | NA | 461 | NA | Yes | No |
| Jones I16 | (-) | (+) | NA | 6;  Rash onset: 4 days before | - fever  - abdominal pain  - constipation, anorexia, - headache. | - transient maculopapular palmar rash   - non-exudative conjunctivitis,  - cervical lymphadenopathy, cracked lips, and prominent lingual papillae (strawberry tongue) | NA | 750 | NA | 2800 | NA | NA | NA | NA | No | No |
| Lidder AK17 | NA | NA | NA | 5 | - fever, sore throat, diarrhea, eye redness, eyelid swelling, and a diffuse rash including bilateral upper and lower eyelid -photophobia and swollen eyelids | -eye redness - erythema multiforme-like rash   - eyelid swollen - diffuse rash including bilateral upper and lower eyelid | NA | NA | NA | NA | NA | NA | NA | NA | No | No |
| Shaigany S18 | (+) | NA | 14 | 6 | fever,  sore throat,  diarrhoea,  bilateral lower extremity pain, ,  diffuse exanthem  - hypotension (systolic blood pressure 80–90 mm Hg),  - tachycardia with episodes of atrial fibrillation with rapid ventricular response, | - fever for more than 5 days,  - erythema multiforme-like rash,  - bilateral non-exudative conjunctivitis,  - erythema or cracking of the lips,  - unilateral cervical lymphadenopathy measuring more than 1.5 cm in diameter - tender left neck swelling with palpable lymphadenopathy,  - periorbital oedema with overlying erythema,  - lip cheilitis,  - targetoid erythematous papules and plaques with central duskiness involving the back, palms, neck, scalp, anterior trunk, and upper thighs. | 120 | 21 196 | 546·7 | 2977 | 31.79 | NA | NA | 117 | No | No |
| Fox S19 | (-) | NA | 12 | NA | fever 39.8 °C throbbing, left-sided neck pain;  nausea; and vomiting.   - sinus tachycardia (120 beats/min) -parotitis. | -parotitis - neck pain | NA | 411.2 | 165 | 450 | NA | NA | 164.4 | NA | Yes | Yes |
| Morris SB4 | (-) | (+) | NA | 5 | Rigors, profuse diarrhea,  diffuse rash x 5 days.  mixed shock (hypovolemic, vasoplegic, cardiogenic)  acute renal failure. | - diffuse rash 5 days | NA | 1082 | 34 | 2818 | NA | NA | NA | NA | NA | No |
| (+) | (+) | NA | 3 | Poor oral intake, chest pressure, palpitations, diaphoresis x 3 days. Hemodynamically unstable on admission. | NA | NA | 1919 | 8.4 | 2310 | NA | NA | NA | NA | NA | No |
| (-) | (+) | NA | 4 | Malaise, bilateral tinnitus, chest pain, and vomiting x 4 days. Hypotensive and mildly hypoxemic on admission. | NA | NA | >100,000 | 21.7 | 3790 | NA | NA | NA | 1412 | Yes | Yes |
| (-) | (+) | NA | 6 | Fever, cough, nausea, vomiting, lymphadenopathy x 6 days. | -fever -lymphadenopathy | NA | 4400 | 31.8 | 1760 | NA | NA | NA | 7 | NA | No |
| (+) | (+) | NA | 4 | Fever, chest pain, abdominal pain, diarrhea, dark urine x 4 days. | NA | NA | 375 | 18.2 | 275 | NA | NA | NA | 74.3 | NA | NA |
| (+) | (+) | NA | 2 | Fever, chills, throat pain, odynophagia x 2 days. | NA | NA | 378 | 35.5 | 1882 | NA | NA | NA | 34.8 | NA | NA |
| (+) | (+) | NA | 1 | Fever, fatigue, throat and neck pain, nausea, vomiting x 1 day. | NA | NA | 351 | 31.9 | 713 | NA | NA | NA | 56.2 | NA | NA |
| (+) | NA | NA | 3 | Weakness, sore throat, shortness of breath, decreased exercise tolerance x 3 days. | NA | NA | 948 | 48.5 | 1365 | NA | NA | NA | NA | NA | NA |
| (-) | NA | NA | 5 | Fever, shortness of breath, cough, diarrhea, poor appetite, dysuria x 5 days. | NA | NA | 7529 | 38.7 | 3519 | NA | NA | NA | NA | NA | NA |
| Hekimian G 20 | (+) | (-) | NA | 2 | Apyretic, dyspnea, severe asthenia | NA | NA | **3280** | **321** | **7530** | **170** | 3.2 | 576 | NA | **Yes** | No |
| (+) | (-) | NA | 1 | fever (39.4°C), dyspnea, cough, severe asthenia | NA | NA | 16576 | 202 | 3930 | 3.5 | 7.5 | 1299 | NA | Yes | No |
| (-) | (+) | NA | 8 | fever (39.5°C), headache, abdominal pain, diarrhea, chest pain, dyspnea | severe asthenia, myalgia, arthralgia, adenopathy | NA | 712 | 389 | 3110 | 12 | 10 | 208 | NA | Yes | No |
| (-) | (+) | NA | 7 | 39.7°C fever, headache, diarrhea, severe asthenia | asthenia | NA | 4485 | NA | 4340 | 8.7 | 8.5 | 363 | NA | Yes | No |
| (-) | (+) | NA | 3 | 40°C fever, abdominal pain, diarrhea | - rash - conjunctivitis - asthenia | NA | 456 | 206 | 1200 | 0.5 | 7.4 | 208 | NA | Yes | No |
| Chérif MY7 | (+) | NA | NA | 4 | fever, myalgia, dyspnea, dry cough, hypogeusia, vomiting, diarrhea, and a pruritic rash.  Chest auscultation found regular tachycardia and fine crackles on the lower lobes. | - chapped lips with ulceration above the upper lip  -lingual enanthem characterized by a reddish and swollen tongue, bilateral erythematous conjunctivitis,  - edema of hands and feet, and hepatomegaly.  - rash on the legs and forearms characterized by erythemato-violaceous macules with irregular borders - no cervical lymph node enlargement. | NA | 5384 | 36.7 | NA | NA | NA | 273 | NA | No | No |
| Sokolovsky S21 | (+) | (+) | NA | 7;  Rash onset: 2 days) | fevers, abdominal pain, vomiting, and diarrhea | - Bilateral nonexudative conjunctivitis  - mucositis with cracked lips  - edema of the bilateral hands and feet  - palmar erythema  - a diffuse maculopapular rash  - cervical lymphadenopathy.  - arthralgia | 30 | NA | 30 | 652 | NA | NA | NA | NA | No | No |
| Cogan E9 | (-) | (+) | NA | 3;  Rash onset: 1 day | - cervical adenopathy,  - a morbilliform erythematous rash affecting the forearms, the hands and the buttocks, red and  - edematous lips and bilateral conjunctivitis with palpebral edema. - the throat: red,  - lungs auscultation was clear and excepting marked tachycardia, heart exam was normal. | - cervical adenopathy,  - a morbilliform erythematous rash affecting the forearms, the hands and the buttocks, red and  - edematous lips and bilateral conjunctivitis with palpebral edema. - the throat: red | NA | 285 | 217 | NA | NA | 759 | NA | NA | Yes | No |
| Flower L10 | (+) | NA | 8 weeks | NA | -fever, headache, sore throat, - abdominal pain, diarrhoea/vomiting, | - arthralgia - swollen feet/legs,  macular rash on hands/forearm | NA | 14000 | 200 | NA | NA | NA | NA | NA | Yes | No |
| Christopher Newton-Cheh11 | (+) | NA | NA | 8 | - Chills, sore throat, cough, myalgias x 2 days - diarrhea and back pain x 3 days;  - pleuritic chest pain and dyspnea.  - profound cardiogenic shock. | -myalgia | NA | 2564 | 127.1 | 8691 | NA | NA | 297 | 53.3 | Yes | NA |
| Meredith J Ventura12 | (+) | (+) | 2 weeks | 5 | - fever, dyspnoea, cough, anosmia - dyspnoea  - odynophagia | -myalgia, polyarthralgia - conjunctival injection - rash - synovitis of the proximal interphalangeal joints. - palmar erythema - lip peeling, - erythematous tongue, - maculopapular rash on chest and arms | 24 | NA | 21.7 | 770 | NA | NA | NA | NA | No | No |

Risk of bias analysis

The risk of bias analysis was performed using the Joanna Briggs Institute (JBI) critical appraisal checklist. We used the JBI critical appraisal checklist for studies reporting prevalence data, which constitutes of eight criterias (for case reports) and ten criterias (for case series). Each of the criteria can be answered as Yes (Y), No (N), Unclear (U), or Not Applicable (NA).

Table S3. The quality of included studies

| First Author | Criteria | | | | | | | | | | |
| --- | --- | --- | --- | --- | --- | --- | --- | --- | --- | --- | --- |
| Criteria | C1 | C2 | C3 | C4 | C5 | C6 | C7 | C8 | C9 | C10 |  |
| Ahsan T | Y | Y | Y | N | U | Y | NA | Y |  |  | Include |
| Kofman AD | Y | Y | Y | Y | Y | Y | NA | Y |  |  | Include |
| Malangu B | Y | Y | Y | Y | Y | Y | NA | Y |  |  | Include |
| Boudhabhay I | Y | N | U | Y | Y | Y | NA | Y |  |  | Include |
| Jones I | Y | Y | Y | U | Y | Y | NA | Y |  |  | Include |
| Lidder AK | Y | Y | Y | Y | Y | Y | NA | U |  |  | Include |
| Shaigany S | Y | Y | Y | Y | Y | Y | NA | Y |  |  | Include |
| Fox S | Y | Y | Y | Y | N | N | Y | Y |  |  | Include |
| Morris SB | Y | Y | Y | Y | Y | Y | Y | Y | N | Y | Include |
| Hekimian G | Y | Y | Y | Y | Y | Y | Y | Y | N | NA | Include |
| Chérif MY | Y | Y | Y | Y | Y | Y | N | Y |  |  | Include |
| Sokolovsky S | Y | Y | Y | Y | Y | N | N | Y |  |  | Include |
| Cogan E | Y | Y | Y | Y | Y | Y | NA | Y |  |  | Include |
| Flower L | Y | Y | Y | Y | Y | Y | NA | Y |  |  | Include |
| Christopher Newton-Cheh | Y | Y | Y | Y | Y | Y | NA | N |  |  | Include |
| Meredith J Ventura | Y | Y | Y | Y | Y | Y | NA | Y |  |  | Include |
